1 **Differential Causal Effects of Type 1 and Type 2 Diabetes on Osteomyelitis Risk:**  
2 **Insights from Mendelian Randomization Analysis**

3 YanHui Li<sup>1</sup>, MD; Chuanyang Zhou<sup>2</sup>, MD; Liming Yang<sup>3</sup>, MD; Lei Tan<sup>2,\*</sup>, MD

4 <sup>1</sup>Department of Cardiology and Echocardiography, Ultrasound Diagnostic Center,  
5 the First Hospital of Jilin University, Changchun, 130021, China

6 <sup>2</sup>Department of OrthopedicsTrauma, Orthopaedic Center, the First Hospital of  
7 Jilin University, Changchun, 130021, China

8 <sup>3</sup>Department of Cardiac Surgery, the First Hospital of Jilin University,  
9 Changchun, 130021, China

10

11 **Running title:** Causal Effects of Diabetes on Osteomyelitis Risk

12 Author for correspondence:

13 Lei Tan, MD

14 Department of Orthopedic Trauma, Orthopaedic Center, The First Hospital of  
15 Jilin University; No. 71 Xinmin Street, Changchun, Jilin, China; tanlei@jlu.edu.cn

16 E-mail addresses:

17 YanHui Li: yan\_hui@jlu.edu.cn

18 Chuanyang Zhou: cyzhou22@mails.jlu.edu.cn

19 Liming Yang: yanglmjdy@jlu.edu.cn

20 Lei Tan: tanlei@jlu.edu.cn

21

1 **Abstract:**

2

3 Background: Osteomyelitis (OM) poses a significant clinical challenge, especially  
4 among individuals with diabetes mellitus (DM). While both type 1 diabetes mellitus  
5 (T1DM) and type 2 diabetes mellitus (T2DM) have been linked to an elevated risk of  
6 OM, the precise causal relationships remain uncertain.

7

8 Methods: We conducted Mendelian randomization (MR) analyses using summary  
9 statistics from genome-wide association studies (GWAS) to explore the causal effects  
10 of T1DM, T2DM, their complications, and glycemic traits on OM risk. The study  
11 utilized the inverse variance weighted (IVW) method, along with weighted median  
12 and MR-Egger for causal estimation, and performed various sensitivity analyses to  
13 ensure robustness. Multivariable MR (MVMR) analysis assessed direct effects, while  
14 two-step mediation MR analyses investigated the mediating role of DM between  
15 rheumatoid arthritis (RA) and OM.

16

17 Results: The MR analysis unveiled distinct causal effects of T1DM and T2DM on  
18 OM risk. Genetically determined T2DM, rather than its complications, significantly  
19 increased OM risk (primary dataset: IVW: OR = 1.13, 95% CI 1.056–1.209,  $p =$   
20  $4E-04$ ; validation dataset: IVW: OR = 1.317, 95% CI 1.14–1.522,  $p = 2E-04$ ;  
21 Meta-analysis: OR=1.206; 95% CI 1.037–1.402;  $p=0.014$ ), with no observable  
22 heterogeneity or horizontal pleiotropy. MVMR analysis confirmed the robustness of  
23 the causal association between T2DM and OM, even after adjusting for potential  
24 confounders such as body mass index. Conversely, T1DM and its complications  
25 showed no significant causal link with OM in either the primary dataset (IVW:  $p =$   
26  $0.071$ ), the validation dataset (IVW:  $p = 0.276$ ), or the meta-analysis (IVW:  $p = 0.242$ ).  
27 Additionally, there was no robust evidence supporting the causal risk of glycemic  
28 traits on OM. Mediation MR analysis underscored T2DM as a pivotal contributor to  
29 the differential effects of RA on OM.

30

31 Conclusions: Mendelian randomization analysis provides compelling evidence of a  
32 significant causal relationship between genetically determined T2DM and increased  
33 OM risk, while T1DM exhibits distinct causal effects. Additionally, our findings  
34 highlight the role of T2DM in mediating the association between RA and OM. Further  
35 research is warranted to elucidate the underlying mechanisms and guide targeted  
36 interventions for OM prevention and management in diabetic populations.

37

38

39 **Introduction**

40 Osteomyelitis (OM), a bone infection, can occur via contiguous spread from

1 surrounding tissues, direct bone trauma, or hematogenous dissemination. It poses a  
2 considerable healthcare burden, with a prevalence of 22 cases per 100,000  
3 person-years in the United States, rising over time, especially among the elderly and  
4 those with diabetes mellitus (DM)<sup>1</sup>. Challenges in treatment include pathogen  
5 identification, bone destruction and repair complexities, and disease recurrence,  
6 resulting in prolonged treatment and poorer prognoses<sup>2</sup>.

7  
8 Diabetes mellitus, affecting nearly 500 million individuals worldwide and projected to  
9 increase by 51% by 2045, poses a significant global health challenge<sup>3</sup>. Type 1 diabetes  
10 mellitus (T1DM) and type 2 diabetes mellitus (T2DM) are the primary forms, each  
11 with distinct pathophysiological mechanisms. While T1DM stems from autoimmune  
12 destruction of pancreatic beta cells, T2DM involves insulin resistance and impaired  
13 insulin secretion<sup>4</sup>. Although observational studies have linked DM to a higher risk of  
14 OM<sup>5,6</sup>, uncertainties persist regarding causal relationships and potential mediators due  
15 to confounding factors and biases in existing research. Moreover, limited studies have  
16 explored the differing impacts of diabetes subtypes on OM risk.

17  
18 Clinical studies have established a link between Rheumatoid Arthritis (RA) and  
19 heightened susceptibility to OM, attributed to chronic inflammation<sup>7,8</sup>. RA is also  
20 associated with diabetes due to a vicious circle perpetuated by glucose derangement  
21 and inflammatory mediators.<sup>9,10</sup>. Given the shared risk profile of RA with both  
22 diabetes and OM, we employed mediation MR analysis to investigate the mediating  
23 role of DM between RA and OM.

24  
25 Randomized controlled trials (RCTs) are ideal for understanding causality, but their  
26 implementation is impractical due to ethical and complex relations between OM and  
27 diabetes. MR offers an alternative using genetic variation as a proxy for exposure,  
28 mitigating bias<sup>11</sup>. This method mirrors RCTs, validating causal relationships while  
29 reducing biases. Moreover, MR elucidates independent causal pathways and potential  
30 mediators linking DM and OM.

31  
32 In this study, we utilized univariable MR (UVMR) analyses to evaluate the impact of  
33 T1DM, T2DM, and their complications on OM risk, as well as to explore the  
34 association between glycemic traits and OM. Multivariable MR (MVMR) analysis  
35 was conducted to assess direct effects by adjusting for potential confounders.  
36 Additionally, two-step mediation MR analyses were employed to explore DM's  
37 mediating role between RA, and OM.

## 38 39 **Methods**

### 40 1. Study design and data sources

1 In this study, we employed UVMR, UVMR and two-step mediation MR analyses to  
 2 examine the causal effects of T1DM, T2DM, their complications and glycemic traits  
 3 on OM risk, and to explore DM's mediating role between RA and OM. Throughout  
 4 the study, we rigorously adhered to three core assumptions ensured the validity of our  
 5 results: (1) establishing a reliable association between genetic variants and the risk  
 6 factor; (2) confirming no association between genetic variants and confounders; and  
 7 (3) ensuring genetic variants solely influence the outcome through the risk factors. A  
 8 comprehensive study design flowchart is provided in Figure 1.  
 9 Our study utilized the largest and most recent publicly available summary statistics  
 10 from multiple genome-wide association studies (GWAS) sources, including the  
 11 FinnGen database, the UK Biobank (UKBB) database, and other large consortia. To  
 12 prevent overlap, we carefully selected exposure factors, designating T1DM and  
 13 T2DM data from FinnGen, and OM data from the UKBB as the primary dataset. DM  
 14 data from non-FinnGen sources and additional data from FinnGen were designated as  
 15 the validation dataset. To ensure robustness, we conducted a meta-analysis of results  
 16 from these datasets. Adherence to the STROBE-MR (Strengthening the Reporting of  
 17 Mendelian Randomization Studies) guidelines was maintained throughout the study<sup>12</sup>.  
 18 Detailed information on the GWAS data used in this study is provided in  
 19 Supplementary Tables 1.  
 20

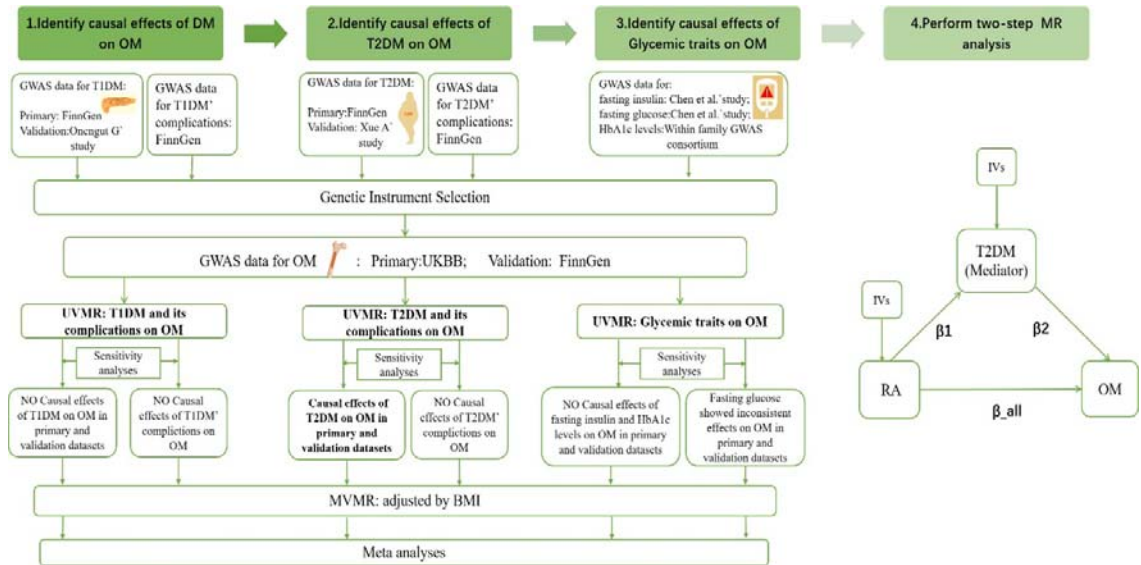

21  
 22 Figure 1. Flowchart of the study design. GWAS, genome-wide association studies;  
 23 T1DM, type 1 diabetes mellitus; T2DM, type 2 diabetes mellitus; RA, rheumatoid  
 24 arthritis; OM, osteomyelitis; UVMR, Univariable MR; MVMR, multivariable  
 25 mendelian randomization; BMI, body mass index; UKBB, United Kingdom Biobank;  
 26 IVs, instrument variables.  
 27

1 2. Genetic association datasets

2 GWAS data for T1DM and T1DM with complications

3 Type 1 Diabetes (T1DM) genetic instruments were selected from two GWAS Studies.  
4 THE Non-UKBB One is based on 5,928 cases and 183,185 controls of European  
5 ancestry from the FinnGen database as the primary source. Validation (Non- FinnGen)  
6 was conducted meta-analysis using data from Onengut-Gumuscu et al.'s study, which  
7 included 6,683 T1DM cases from the UK Genetic Resource Investigating Diabetes  
8 cohort and control samples (N=12,173) from four additional cohorts, all reporting  
9 European ancestry<sup>13</sup>. T1DM with complications dataset obtained from FinnGen  
10 database<sup>14</sup>. Detailed information on single nucleotide polymorphisms (SNPs) used in  
11 this study is presented in Supplementary Tables S4 and S6.

12

13 GWAS data for T2DM and T2DM with complications

14 The genetic instruments for T2DM were derived from FinnGen database comprising  
15 32,469 cases and 183,185 controls of European ancestry as the primary source  
16 (Non-UKBB). For validation (Non-FinnGen), we utilized data from the GWAS  
17 meta-analysis study by Xue A et al., which included a sample of 61,714 cases and  
18 593,952 controls with T2DM. This study combined three GWAS datasets of European  
19 ancestry, including UKBB, representing the vast majority (99.4%) of individuals of  
20 European ancestry<sup>15</sup>. T2DM with complications dataset obtained from FinnGen  
21 database<sup>14</sup>. Detailed information regarding the SNPs used can be found in  
22 Supplementary Tables S6 and S10.

23

24 GWAS data for Hyperglycemia traits

25 SNPs were chosen from a GWAS meta-analysis by Chen et al., involving 151,013  
26 European individuals for fasting insulin, up to 200,622 participants for fasting glucose  
27 <sup>16</sup>. The GWAS summary statistics for HbA1c levels were obtained from Within family  
28 GWAS consortium, which included 45,734 participants of European ancestry. All  
29 participants had European ancestry, and there was no overlap with the outcome data.  
30 Detailed SNP information is available in Supplementary Tables S12, 14 and 16.

31

32 GWAS data for Body mass index (BMI)

33 The GWAS summary statistics for MVMR (BMI) were sourced from Within family  
34 GWAS consortium, involving 99,998 European participants. There was no overlap  
35 between this dataset and other exposures and outcomes considered in our study.

36

37 GWAS data for RA

38 The GWAS summary statistics for RA were obtained from Eyre S et al., which  
39 included 13,838 cases and 33,742 controls of European ancestry<sup>17</sup>. There was no  
40 overlap between this dataset and all exposures and outcomes considered in our study.

1 Supplementary Table 18 provides details of the traits involved in this analysis.

2

3 GWAS data for Outcomes

4 The study outcome is OM, defined as inflammation of bone and its structures due to  
5 pyogenic bacterial infection. We analyzed the associations between selected  
6 instruments and OM using summary GWAS data from the UK Biobank (4,836 cases,  
7 481,648 controls) as the primary source. Validation was performed using FinnGen  
8 data (842 cases, 209,575 controls), all of European ancestry.

9

10 3.Genetic Instrument Selection

11 For genetic instrument selection, we established a genome-wide significance  
12 threshold. SNPs with a P-value less than  $5 \times 10^{-8}$  were considered significant for  
13 T1DM, T2DM, glycemc traits, BMI and RA. Since only few SNPs were identified  
14 for part of complications of DM when they were as the exposure, a higher cutoff  
15 ( $p < 1e-6$ ) was chosen. Variants meeting these criteria were then clumped for

16 linkage disequilibrium (LD) using a distance window of 10,000 kB and an  $r^2 < 0.01$ .

17 To avoid the risk of weak instrumental bias, the F statistic was performed to evaluate  
18 the strength of the IV. When  $F > 10$ , the association between the IV and exposures  
19 was deemed to be sufficiently robust, thereby safeguarding the results of the MR  
20 analysis against potential weak instrumental bias. The PhenoScanner  
21 (<http://www.phenoscaner.medschl.cam.ac.uk/>) was introduced to identify and  
22 remove SNPs with potential associations with confounding factors that might violate  
23 the independence assumption<sup>18</sup>. After several rounds of rigorous filtering, a set of  
24 eligible instrumental variables for the subsequent MR analysis were obtained.  
25 Summary of the instrument variables used in this study is presented in Supplementary  
26 Tables S2.

27

28 4. Statistical analysis

29 We employed the "TwoSampleMR"<sup>22</sup>, "MendelianRandomization"<sup>23</sup> and  
30 "MR-PRESSO"<sup>24</sup> packages for UVMR, MVMR, and Mediation MR analyses,  
31 including sensitivity tests. Causal estimates were expressed as odds ratios (ORs) with  
32 95% confidence intervals (CIs). Statistical analyses were conducted using R software  
33 version 4.3.2 (The R Foundation for Statistical Computing).

34

35 UVMR analysis

36 Causal effects were estimated using the random-effects inverse variance weighted  
37 (IVW) method<sup>19</sup>. To ensure unbiased estimates, MR analyses were also conducted  
38 using four alternative methods (MR Egger, Simple mode, Weighted median, and  
39 Weighted mode). A causal effect was considered suggested if the IVW p-value was

1 less than 0.05. Moreover, a causal effect was deemed significant if the IVW p-value  
2 fell below the Bonferroni-corrected threshold ( $p < 0.05/21 = 0.002$ ) for primary  
3 datasets and ( $p < 0.05/7 = 0.007$ ) for validation datasets, coupled with consistent  
4 directionality in the weighted median and MR-Egger results.

#### 5 6 MVMR

7 The DM and BMI shared genetic risk factors<sup>20</sup>. To mitigate the confounding influence  
8 of BMI on DM, MVMR analysis adjusting for BMI was performed. For the  
9 significant causal associations in the univariable MR analysis, the MVMR analysis  
10 was performed using the MVMR-IVW method, aiming to adjust for potential  
11 confounding factors BMI<sup>21</sup>.

#### 12 13 Mediation MR analysis

14 Clinical studies indicate that RA is associated with an increased risk of OM<sup>9</sup>. To  
15 explore whether DM mediates this association, we conducted two-step mediation MR  
16 analysis, assessing three key estimates: (i) the total effect of RA on OM ( $\beta_{\text{all}}$ ); (ii)  
17 the direct effect of RA on DM ( $\beta_1$ ); and (iii) the direct effect of DM on OM ( $\beta_2$ ).  
18 Significance was determined by IVW p-values ( $p < 0.05$ ), with mediation effect  
19 proportions estimated using the delta method. The mediation effect is calculated as  $\beta_1$   
20 \*  $\beta_2$ . The proportion of the mediation effect was estimated as the total causal effect of  
21  $\beta_{\text{all}}$  divided by the mediation effect. We performed two-step mediation MR analyses  
22 in both primary and validation datasets to ensure result reliability and compared them  
23 for consistency.

#### 24 25 Sensitivity analyses

26 Sensitivity analyses were performed to address horizontal pleiotropy and  
27 heterogeneity. We utilized weighted median, MR-Egger, and MR-PRESSO methods  
28 to verify assumptions and assess robustness, identifying potential horizontal  
29 pleiotropy. The weighted median model provides consistent estimates when over half  
30 of the weights are from valid IVs<sup>25</sup>. MR-Egger regression detects horizontal  
31 pleiotropy and corrects for it, with its intercept term indicating unbalanced directional  
32 pleiotropy ( $p < 0.05$ )<sup>26</sup>. MR-PRESSO identifies and corrects outliers, providing  
33 outlier-corrected estimates. The MR-PRESSO distortion test compares estimation  
34 differences before and after outlier removal. Cochran's Q test evaluates heterogeneity  
35 among SNPs for exposure and confirms consistency between MR assumptions and  
36 analyses ( $p < 0.05$ )<sup>24</sup>. Credible causal inference requires consistent directionality  
37 across the three methods and the absence of horizontal pleiotropic effects.

## 38 39 **Results**

### 40 1.NO Causal effects of T1DM on OM

1 The causal effect of T1DM on OM was not supported in either the primary dataset  
 2 (IVW:  $p = 0.071$ ), the validation dataset (IVW:  $p = 0.276$ ), or the meta-analysis (IVW:  
 3  $p = 0.242$ ). Sensitivity analyses revealed consistent results with no evidence of  
 4 horizontal pleiotropy (MR-Egger intercept  $p = 0.521$ ;  $p = 0.967$ ) and no heterogeneity  
 5 (Cochran's Q statistic:  $p = 0.089$ ;  $p = 0.244$ ) for the primary and validation datasets,  
 6 respectively. No outliers were found in the MR-PRESSO test. To further address the  
 7 potential influence of confounding factors and level pleiotropy, we conducted MVMR.  
 8 After controlling for BMI, no statistical significance remained between T1DM and  
 9 OM (Figure 2; Supplementary Table S3). Leave-one-out and scatter plots are provided  
 10 in Supplementary Figures 1-4.

11 To explore the relationship between different T1DM subgroups and OM, we analyzed  
 12 data from the comprehensive FinnGen database, known for its coverage of T1DM  
 13 complications. Our analysis revealed no causal correlations between either T1DM  
 14 without complications or T1DM with complications and OM (IVW:  $p = 0.478$ ;  
 15  $p = 0.777$ , respectively). Further subgroup analyses within T1DM with  
 16 complications showed no causal links with OM. Specifically, IVW  $P$  values for OM  
 17 were 0.885 for T1DM with coma, 0.843 for T1DM with ketoacidosis, 0.770 for  
 18 T1DM with ophthalmic complications, 0.978 for T1DM with renal complications,  
 19 0.197 for T1DM with peripheral circulatory complications, and 0.345 for T1DM with  
 20 neurological complications. No evidence of horizontal pleiotropy or heterogeneity  
 21 was found in these MR analyses. (Figure 2; Supplementary Table S5).

| Exposure                             | Outcome     | nsnp | method          | OR(95% CI)             | pval         | MVMR_pval | H_pval | P_pval |
|--------------------------------------|-------------|------|-----------------|------------------------|--------------|-----------|--------|--------|
| T1DM(FinnGen)                        | OM(UKBB)    | 58   | IVW             | 1.031 (0.997 to 1.066) | 0.071        | 0.302     | 0.089  |        |
|                                      |             |      | MR Egger        | 1.046 (0.991 to 1.105) | 0.127        |           | 0.521  |        |
|                                      |             |      | Weighted median | 1.044 (1.008 to 1.082) | <b>0.016</b> |           |        |        |
| T1DM                                 | OM(FinnGen) | 36   | IVW             | 1.054 (0.959 to 1.159) | 0.276        | 0.144     | 0.244  |        |
|                                      |             |      | MR Egger        | 1.051 (0.885 to 1.248) | 0.575        |           | 0.967  |        |
|                                      |             |      | Weighted median | 1.008 (0.866 to 1.174) | 0.916        |           |        |        |
| Meta                                 |             |      |                 |                        |              |           |        |        |
| T1DM                                 | OM          |      | IVW             | 1.153 (0.908 to 1.465) | 0.242        |           |        |        |
|                                      |             |      | MR Egger        | 1.166 (0.871 to 1.559) | 0.302        |           |        |        |
|                                      |             |      | Weighted median | 1.193 (0.881 to 1.615) | 0.253        |           |        |        |
| T1DM without complications           | OM(UKBB)    | 15   | IVW             | 0.983 (0.937 to 1.031) | 0.487        | 0.43      | 0.161  |        |
|                                      |             |      | MR Egger        | 0.988 (0.896 to 1.090) | 0.815        |           | 0.907  |        |
|                                      |             |      | Weighted median | 1.012 (0.953 to 1.075) | 0.697        |           |        |        |
| T1DM with multiple complications     | OM(UKBB)    | 15   | IVW             | 1.004 (0.975 to 1.035) | 0.777        | 0.734     | 0.242  |        |
|                                      |             |      | MR Egger        | 1.013 (0.968 to 1.059) | 0.594        |           | 0.631  |        |
|                                      |             |      | Weighted median | 1.017 (0.982 to 1.053) | 0.352        |           |        |        |
| coma                                 | OM(UKBB)    | 9    | IVW             | 1.002 (0.973 to 1.032) | 0.885        | 0.849     | 0.155  |        |
|                                      |             |      | MR Egger        | 1.013 (0.964 to 1.065) | 0.626        |           | 0.606  |        |
|                                      |             |      | Weighted median | 1.012 (0.982 to 1.043) | 0.450        |           |        |        |
| ketoacidosis                         | OM(UKBB)    | 10   | IVW             | 1.003 (0.972 to 1.035) | 0.843        | 0.772     | 0.063  |        |
|                                      |             |      | MR Egger        | 1.017 (0.969 to 1.068) | 0.517        |           | 0.486  |        |
|                                      |             |      | Weighted median | 1.011 (0.982 to 1.042) | 0.450        |           |        |        |
| ophthalmic complications             | OM(UKBB)    | 16   | IVW             | 0.995 (0.959 to 1.031) | 0.770        | 0.995     | 0.069  |        |
|                                      |             |      | MR Egger        | 1.028 (0.973 to 1.086) | 0.340        |           | 0.147  |        |
|                                      |             |      | Weighted median | 1.002 (0.964 to 1.042) | 0.903        |           |        |        |
| renal complication                   | OM(UKBB)    | 7    | IVW             | 1.000 (0.971 to 1.031) | 0.978        | 0.801     | 0.238  |        |
|                                      |             |      | MR Egger        | 1.030 (0.992 to 1.069) | 0.182        |           | 0.086  |        |
|                                      |             |      | Weighted median | 1.013 (0.983 to 1.045) | 0.404        |           |        |        |
| peripheral circulatory complications | OM(UKBB)    | 3    | IVW             | 1.018 (0.991 to 1.045) | 0.197        | 0.177     | 0.58   |        |
|                                      |             |      | MR Egger        | 1.020 (0.937 to 1.111) | 0.725        |           | 0.963  |        |
|                                      |             |      | Weighted median | 1.017 (0.989 to 1.047) | 0.237        |           |        |        |
| neurological complications           | OM(UKBB)    | 9    | IVW             | 1.016 (0.983 to 1.051) | 0.345        | 0.424     | 0.35   |        |
|                                      |             |      | MR Egger        | 1.049 (0.969 to 1.136) | 0.275        |           | 0.412  |        |
|                                      |             |      | Weighted median | 1.035 (0.993 to 1.078) | 0.107        |           |        |        |

22

0.7 1 1.3 1.6 1.9



1 Figure. 2. Genetically predicted type 1 diabetes and its complications: associations  
2 with osteomyelitis. T1DM, type 1 diabetes mellitus; OM, osteomyelitis; UVMR,  
3 Univariable MR; MVMR, multivariable mendelian randomization; OR, odds ratio; CI,  
4 confidence interval; UKBB, United Kingdom Biobank; IVW, Inverse Variance  
5 Weighted; H, Heterogeneity; P, Pleiotropy.  $p$ -values (IVW)  $\leq 0.05$  was considered  
6 suggested different. The Bonferroni-corrected results of the  $p$ -values (IVW) in each  
7 group remained consistent with the uncorrected results.

8

## 9 2. Causal effects of T2DM on OM

10 Using IVs for T2DM, we found evidence linking genetically predicted T2DM to  
11 increased OM risk (primary dataset: IVW: OR = 1.13, 95% CI 1.056–1.209,  $p =$   
12 4.20E-04; validation dataset: IVW: OR = 1.317, 95% CI 1.14–1.522,  $p = 0.007$ ;  
13 Meta-analysis: OR 1.203; 95% CI 1.038–1.395;  $p = 1.85E-04$ ) (Figure 2). Furthermore,  
14 after Bonferroni correction, the results remained statistically significant. The three  
15 MR methods showed consistent directions. After MVMR analysis controlling for BMI,  
16 statistical significance remained between T2DM and OM (Figure 3; Supplementary  
17 Table S7). No outliers were detected by MR-PRESSO, and no heterogeneity was  
18 observed by Cochran's Q test. MR-Egger intercept tests found no horizontal  
19 pleiotropy. Leave-one-out analysis showed consistent T2DM results (Fig. 2).  
20 Leave-one-out and scatter plots are provided in Supplementary Figures 5-8.

21 Using GWAS data for T2DM complications from the FinnGen database, we initially  
22 observed suggested causal correlations between both T2DM without complications  
23 and T2DM with multiple complications and OM (IVW: OR 1.128; 95% CI  
24 1.033–1.232;  $p = 0.008$ ; OR 1.086; 95% CI 1.109–1.158;  $p = 0.011$ ),  
25 respectively. However, after multiple testing correction, these causal correlations  
26 disappeared. Furthermore, analyses for T2DM with other complications revealed no  
27 significant causal correlations with OM. Specifically, IVW-P values for OM were  
28 0.164 for T2DM with coma, 0.349 for T2DM with ketoacidosis, 0.215 for T2DM with  
29 ophthalmic complications, and 0.053 for T2DM with peripheral circulatory  
30 complications. These MR analyses showed no evidence of horizontal pleiotropy or  
31 heterogeneity (Figure 3; Supplementary Table S9). Insufficient genetic instruments  
32 were available for MR analyses of other T2DM-related complications.

33

34 The findings suggest that genetically predicted T2DM, rather than T2DM with  
35 complications, is a risk factor for OM.

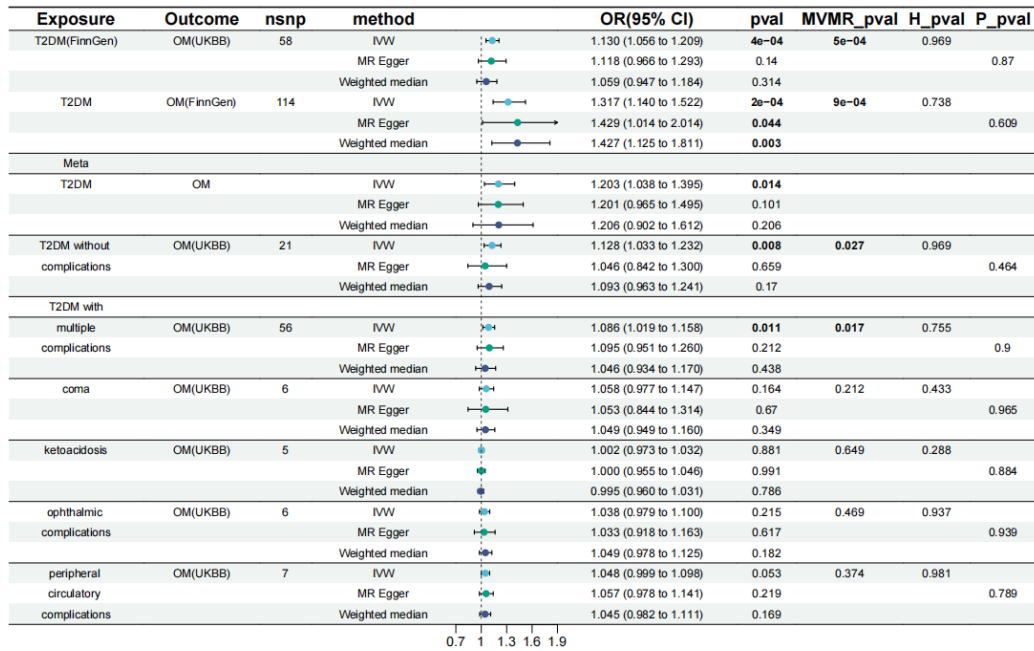

1  
2 Figure. 3. Genetically predicted type 2 diabetes and its complications: associations  
3 with osteomyelitis. T2DM, type 2 diabetes mellitus; OM, osteomyelitis; UVMR,  
4 Univariable MR; MVMR, multivariable mendelian randomization; OR, odds ratio; CI,  
5 confidence interval; UKBB, United Kingdom Biobank; IVW, Inverse Variance  
6 Weighted; H, Heterogeneity; P, Pleiotropy. The IVW p-value ( $< \alpha 0.05$ ) was  
7 considered a statistically suggested difference. IVW p-values below the  
8 Bonferroni-corrected threshold were considered statistically significant.

9  
10 **3. Inconsistent Causal Effects of Glycemic Traits on OM**

11 There was no causal relationship between fasting insulin and OM in either the  
12 primary dataset (IVW:  $p = 0.566$ ) or the validation dataset (IVW:  $p = 0.463$ ).  
13 However, fasting glucose showed inconsistent effects on OM. In the primary dataset,  
14 the IVW analysis yielded a p-value greater than the threshold (IVW: OR = 1.265, 95%  
15 CI: 0.972-1.645,  $p = 0.08$ ), while in the validation dataset, the p-value was smaller  
16 than the Bonferroni-corrected threshold (IVW: OR = 2.347, 95% CI: 1.276-4.318,  $p =$   
17 0.006). However, meta-analysis did not support fasting glucose as a risk factor for  
18 OM (IVW:  $p = 0.11$ ). Similarly, inconsistent results were observed for HbA1c levels  
19 and OM in the primary dataset ( $p = 0.29$ ) and the validation dataset (IVW:  $p = 0.04$ ),  
20 with the latter failing the Bonferroni correction for multiple testing. Nevertheless,  
21 meta-analysis indicated that HbA1c levels were not associated with an increased risk  
22 of OM (IVW:  $p = 0.59$ ). Sensitivity analyses confirmed no evidence of heterogeneity  
23 or horizontal pleiotropy (Table 1, Supplementary Tables S11, S13 and S15). These  
24 findings suggest that there may be complex relationships between glycemic traits and  
25 OM.

**Table 1. MR and Sensitivity analysis of Glycemic Traits with the risk of OM**

| Exposure        | Method          | OM(UKBB) |       |      |      |       |                     | OM(FinnGen)           |      |       |      |          |          | Meta                |                       |      |      |      |
|-----------------|-----------------|----------|-------|------|------|-------|---------------------|-----------------------|------|-------|------|----------|----------|---------------------|-----------------------|------|------|------|
|                 |                 | nsnp     | beta  | se   | pval | MWR p | H <sub>2</sub> pval | P <sub>het</sub> pval | nsnp | beta  | se   | pval     | MWR p    | H <sub>2</sub> pval | P <sub>het</sub> pval | beta | se   | Pval |
| Fasting insulin | IWV             | 38       | 0.14  | 0.24 | 0.57 | 0.50  | 0.92                | 0.74                  | 38   | 0.43  | 0.59 | 0.46     | 0.45     | 0.44                | 0.524                 | 0.18 | 0.22 | 0.42 |
|                 | MR Egger        |          | 0.37  | 0.73 | 0.61 |       |                     |                       |      | -0.73 | 1.90 | 0.70     |          |                     |                       | 0.23 | 0.68 | 0.74 |
|                 | Weighted median |          | 0.21  | 0.33 | 0.52 |       |                     |                       |      | 0.89  | 0.86 | 0.30     |          |                     |                       | 0.30 | 0.31 | 0.33 |
| Fasting glucose | IWV             | 63       | 0.24  | 0.13 | 0.08 | 0.08  | 0.67                | 0.76                  | 63   | 0.85  | 0.31 | 6.10E-03 | 1.20E-03 | 0.79                | 0.11                  | 0.48 | 0.30 | 0.11 |
|                 | MR Egger        |          | 0.17  | 0.24 | 0.49 |       |                     |                       |      | 1.60  | 0.56 | 5.86E-03 |          |                     | 0.80                  | 0.71 | 0.26 |      |
|                 | Weighted median |          | 0.27  | 0.20 | 0.17 |       |                     |                       |      | 1.02  | 0.48 | 0.04     |          |                     | 0.52                  | 0.35 | 0.14 |      |
| HbA1c levels    | IWV             | 29       | -0.06 | 0.06 | 0.29 | 0.16  | 0.61                | 0.06                  | 25   | 0.33  | 0.16 | 0.04     | 0.11     | 0.80                | 0.61                  | 0.10 | 0.19 | 0.59 |
|                 | MR Egger        |          | -0.26 | 0.12 | 0.03 |       |                     |                       |      | 0.48  | 0.34 | 0.17     |          |                     | 0.04                  | 0.37 | 0.91 |      |
|                 | Weighted median |          | -0.18 | 0.09 | 0.04 |       |                     |                       |      | 0.41  | 0.24 | 0.09     |          |                     | 0.07                  | 0.29 | 0.81 |      |

Abbreviation: MR Mendelian Randomization; OM osteomyelitis; UKBB United Kingdom Biobank; IWV Inverse Variance Weighted; H<sub>2</sub> Heterogeneity; P<sub>het</sub> Pleiotropy; SNP single nucleotide polymorphism; CR odds ratio.

1  
2 **4.T2DM mediates the causal effect of RA on OM**  
3 We employed two-step mediation MR analyses in both primary and validation  
4 datasets to explore T2DM's mediation between RA, and OM. RA was associated with  
5 increased OM risk (IVW: OR = 1.058, 95% CI 1.005–1.114, P = 0.031), with a  
6 25.8% mediation effect (95% CI 9.0%–42.5%) in the primary dataset. Consistent  
7 results were observed in the validation dataset analysis, with T2DM mediating 14.5%  
8 (95% CI 6.1%–23.0%) of the RA-OM relationship. No heterogeneity or horizontal  
9 pleiotropy was detected in any analysis (Table 2; Supplementary Table 17).

**Table 2 Mediation effect of T2DM in the association between RA and OM**

| Exposure | Mediator | Outcome | Dataset    | Total effect β <sub>all</sub> |      |          | Direct effect β <sub>1</sub> |      |          | Direct effect β <sub>2</sub> |      |          | Mediation effect     |                       |
|----------|----------|---------|------------|-------------------------------|------|----------|------------------------------|------|----------|------------------------------|------|----------|----------------------|-----------------------|
|          |          |         |            | beta                          | se   | P        | beta                         | se   | P        | beta                         | se   | P        | Effect size (95% CI) | Proportion % (95% CI) |
| RA       | T2DM     | OM      | Primary    | 0.06                          | 0.03 | 3.14E-02 | 0.12                         | 0.02 | 4.91E-07 | 0.12                         | 0.03 | 4.20E-04 | 0.014(0.005-0.024)   | 25.8(9.0-42.5)        |
|          |          |         | Validation | 0.18                          | 0.05 | 5.34E-04 | 0.09                         | 0.01 | 7.67E-17 | 0.28                         | 0.07 | 1.85E-04 | 0.026(0.011-0.041)   | 14.5(6.1-23.0)        |

Abbreviation: MR Mendelian Randomization; T2DM type 2 diabetes mellitus; OM osteomyelitis; RA Rheumatoid arthritis; CR odds ratio.  
β<sub>all</sub>: exposure to outcome (1WVMR)  
β<sub>1</sub>: exposure to mediator (1WVMR)  
β<sub>2</sub>: mediator to outcome (1WVMR)

10

## 11 Discussion

12 Our MR study revealed distinct causal effects of T1DM and T2DM on OM risk.  
13 Specifically, T2DM showed a significant association with increased OM risk, while  
14 T1DM and its complications did not exhibit a causal relationship with OM.  
15 Additionally, glycemic traits (fasting insulin, fasting glucose, and HbA1c) showed  
16 inconsistent effects on OM. Furthermore, we identified that T2DM mediates the  
17 causal effect of RA on OM. These findings deepen our understanding of the differing  
18 roles of T1DM and T2DM in OM development and provide avenues for further  
19 mechanistic investigation.

20

21 The discovery that that T1DM and its complications did not exhibit a causal  
22 association with OM challenges our conventional understanding and contradicts some  
23 previous study findings.<sup>27–29</sup> Traditionally, diabetes, including both T1DM and  
24 T2DM, has been linked to an elevated risk of various infection complications, such as  
25 OM. Moreover, individuals with diabetes face a higher mortality risk from infections  
26 compared to the general population, with T1DM patients particularly susceptible<sup>30</sup>.  
27 However, our Mendelian randomization analysis, which provides more robust causal  
28 inference compared to observational studies, suggests otherwise. This unexpected

1 result prompts a reevaluation of the assumed causal relationship between T1DM and  
2 OM. One possible interpretation could involve the complex interplay between  
3 diabetes subtypes and their respective pathophysiological mechanisms. While T2DM  
4 is commonly associated with metabolic abnormalities and chronic inflammation, the  
5 etiology of T1DM involves autoimmune destruction of pancreatic beta cells. It is  
6 plausible that the mechanisms underlying T1DM may not directly contribute to the  
7 development of OM, as observed in our study. Another explanation for this  
8 discrepancy could be the differences in study design and inherent biases between  
9 observational studies and Mendelian randomization. Observational studies are limited  
10 to establishing associations and are susceptible to confounding factors, reverse  
11 causation, and measurement errors, which may lead to spurious associations. In  
12 contrast, Mendelian randomization leverages genetic variants as instrumental  
13 variables to mimic the random assignment of exposures, thereby reducing bias and  
14 providing more reliable causal estimates<sup>31</sup>.

15  
16 The finding that T2DM is significantly associated with increased OM risk aligns with  
17 previous clinical studies<sup>1,5,6</sup>. However, our analysis reveals an unexpected causal  
18 relationship between glycemic traits and OM risk. The absence of associations with  
19 fasting insulin and HbA1c implies that insulin and HbA1c levels may not contribute  
20 to OM risk. Inconsistent causal effects of fasting glucose were observed between the  
21 primary dataset and validation dataset, and meta-analysis did not support fasting  
22 glucose as a risk factor for OM. Therefore, T2DM may influence OM risk through  
23 alternative mechanisms beyond high blood sugar, such as immune response  
24 dysfunction<sup>32</sup> or metabolic disturbances<sup>33</sup>. These findings emphasize the need for  
25 further research to elucidate the specific pathways through which T2DM affects OM  
26 risk. Additionally, they underscore the importance of comprehensive risk assessment  
27 in diabetic patients, beyond glycemic control alone.

28  
29 Previous research has established RA as a common risk factor for both T2DM and  
30 OM<sup>7,9,10</sup>. Our study further investigated their associations with T2DM and OM risk,  
31 revealing the extent to which T2DM mediates RA's causal effect on OM. These  
32 findings underscore the importance of addressing RA to prevent OM and highlight  
33 T2DM's role in connecting RA with OM. Such insights have significant clinical  
34 implications, suggesting targeted interventions for diabetic patients with RA to  
35 mitigate their heightened susceptibility to OM, particularly those requiring orthopedic  
36 procedures like fracture fixation or joint replacement. Strategies focusing on  
37 optimizing glycemic control and managing inflammation in this patient population  
38 may help reduce the risk of OM.

39  
40 Our study reveals distinct causal effects of T1DM and T2DM on OM risk,

1 underscoring the need for tailored disease management. Further validation is essential  
2 for a comprehensive understanding of these findings. The observed differences in OM  
3 risk between T1DM and T2DM warrant further investigation into underlying  
4 pathophysiological heterogeneity. Future research should focus on identifying  
5 biomarkers to stratify diabetic patients based on their susceptibility to OM and related  
6 complications. Additionally, our findings suggest potential drug repurposing for OM  
7 management among diabetic patients, emphasizing the importance of clinical trials to  
8 validate efficacy and safety profiles. While our study provides valuable insights,  
9 prospective clinical studies are needed to validate our findings and improve clinical  
10 outcomes for diabetic patients.

11  
12 Our study boasts several strengths. Firstly, it pioneers the investigation into the causal  
13 link between DM and OM using MR approaches. Notably, it marks the inaugural  
14 documentation of the absence of a causal effect of T1DM on OM. Secondly, we  
15 employ MR techniques to mitigate potential confounding biases and ensure reliable  
16 causal inferences. Thirdly, our use of GWAS data primarily from European ancestry  
17 populations minimizes population stratification bias. All outcomes underwent rigorous  
18 validation through various sensitivity analyses, including inverse-variance weighted  
19 (IVW), MR-Egger, MR-PRESSO, leave-one-out analysis, and MVMR, with multiple  
20 testing corrections applied. Furthermore, consistent results across different datasets  
21 and meta-analysis underscored the robustness of our findings.

22  
23 Our study has limitations affecting generalizability and interpretation. Focusing on a  
24 single ethnic group restricts broader applicability<sup>34</sup>. Replicating in diverse cohorts is  
25 necessary. Reliance on summary statistics from GWAS may introduce  
26 misclassification bias. Additionally, while benefiting from large-scale data, our  
27 sample size may be insufficient to detect small effect sizes or rare variants. Potential  
28 pleiotropy in Mendelian randomization analysis and residual confounding remains  
29 concerns, despite sensitivity analyses.

30  
31 **In conclusion**, our study offers compelling evidence of a significant causal  
32 relationship between genetically determined T2DM and heightened risk of OM, while  
33 T1DM shows no causal effects. Additionally, our findings highlight the role of T2DM  
34 in mediating the association between RA and OM. These insights hold promise for  
35 improving clinical outcomes among diabetic individuals and those at risk of OM.

### 36 **Acknowledgments**

37  
38 We want to acknowledge the participants and investigators of the FinnGen study,  
39 UK Biobank, and other GWASs included in this study. Without the dedication of these  
40 organizations and their members, this article would have been difficult to complete.

1       **Funding**

2       We thank the Jilin Province Science and Technology Development Grant (grant  
3 Nos. 20210101452JC and YDZJ202301ZYTS096) for funding this study.

4       **Conflict of Interest**

5       The authors declare that they have no conflicts of interest.

6       **Data Availability Statement**

7       All data generated or analyzed during this study are included in this article and  
8 its supplementary information files.

9       **Ethics Statement**

10       Not applicable

11       **Author Contributions:** L.T. conceived the project, designed the study and  
12 revised the manuscript.; YH.L. wrote the manuscript; CY.Z. collected data from the  
13 public database; L.T., YH.L. and LM.Y. performed the study, and all authors reviewed  
14 the manuscript.

15       **Competing interests**

16       The authors declare no competing interests.

17       **Consent for Publication**

18       Not applicable

19       **Abbreviations**

20       T1DM, type 1 diabetes mellitus; T2DM, type 2 diabetes mellitus; OM,  
21 osteomyelitis; IVW: Inverse variance weighted; IVs: Instrumental variables; SNPs:  
22 Single Nucleotide Polymorphisms; UVMR, Univariable MR; MVMR: Multivariable  
23 MR; OR: Odds ratio; CI, confidence interval; GWAS: Genome-Wide Association  
24 Study; UKBB, United Kingdom Biobank

25

26       **References**

- 27 1. Kremers, H. M. *et al.* Trends in the epidemiology of osteomyelitis: a  
28 population-based study, 1969 to 2009. *J. Bone Joint Surg. Am.* **97**, 837–845 (2015).  
29 2. Lew, D. P. & Waldvogel, F. A. Osteomyelitis. *Lancet Lond. Engl.* **364**, 369–379  
30 (2004).  
31 3. Saeedi, P. *et al.* Global and regional diabetes prevalence estimates for 2019 and  
32 projections for 2030 and 2045: Results from the International Diabetes Federation  
33 Diabetes Atlas, 9th edition. *Diabetes Res. Clin. Pract.* **157**, 107843 (2019).  
34 4. Banday, M. Z., Sameer, A. S. & Nissar, S. Pathophysiology of diabetes: An  
35 overview. *Avicenna J. Med.* **10**, 174–188 (2020).  
36 5. Al-Mayahi, M. *et al.* Associations of diabetes mellitus with orthopaedic infections.  
37 *Infect. Dis. Lond. Engl.* **48**, 70–73 (2016).  
38 6. Peng, J. *et al.* Epidemiological, Clinical and Microbiological Characteristics of  
39 Patients with Post-Traumatic Osteomyelitis of Limb Fractures in Southwest China: A  
40 Hospital-Based Study. *J. Bone Jt. Infect.* **2**, 149–153 (2017).

- 1 7. Jha, Y. & Chaudhary, K. Diagnosis and Treatment Modalities for Osteomyelitis.  
2 *Cureus* **14**, e30713.
- 3 8. Al-Ahaideb, A. Septic arthritis in patients with rheumatoid arthritis. *J. Orthop.*  
4 *Surg.* **3**, 33 (2008).
- 5 9. Di Muzio, C., Cipriani, P. & Ruscitti, P. Rheumatoid Arthritis Treatment Options  
6 and Type 2 Diabetes: Unravelling the Association. *BioDrugs Clin. Immunother.*  
7 *Biopharm. Gene Ther.* **36**, 673–685 (2022).
- 8 10. Z, T., J, M., A, V., H, C. & Ah, H. The relationship between rheumatoid arthritis  
9 and diabetes mellitus: a systematic review and meta-analysis. *Cardiovasc. Endocrinol.*  
10 *Metab.* **10**, (2021).
- 11 11. Sekula, P., Del Greco M, F., Pattaro, C. & Köttgen, A. Mendelian Randomization  
12 as an Approach to Assess Causality Using Observational Data. *J. Am. Soc. Nephrol.*  
13 *JASN* **27**, 3253–3265 (2016).
- 14 12. Skrivankova, V. W. *et al.* Strengthening the reporting of observational studies in  
15 epidemiology using mendelian randomisation (STROBE-MR): explanation and  
16 elaboration. *The BMJ* **375**, n2233 (2021).
- 17 13. Onengut-Gumuscu, S. *et al.* Fine mapping of type 1 diabetes susceptibility loci  
18 and evidence for colocalization of causal variants with lymphoid gene enhancers. *Nat.*  
19 *Genet.* **47**, 381–386 (2015).
- 20 14. Kurki, M. I. *et al.* FinnGen provides genetic insights from a well-phenotyped  
21 isolated population. *Nature* **613**, 508–518 (2023).
- 22 15. Xue, A. *et al.* Genome-wide association analyses identify 143 risk variants and  
23 putative regulatory mechanisms for type 2 diabetes. *Nat. Commun.* **9**, 2941 (2018).
- 24 16. Chen, J. *et al.* The trans-ancestral genomic architecture of glycemic traits. *Nat.*  
25 *Genet.* **53**, 840–860 (2021).
- 26 17. Eyre, S. *et al.* High-density genetic mapping identifies new susceptibility loci for  
27 rheumatoid arthritis. *Nat. Genet.* **44**, 1336–1340 (2012).
- 28 18. Kamat, M. A. *et al.* PhenoScanner V2: an expanded tool for searching human  
29 genotype-phenotype associations. *Bioinforma. Oxf. Engl.* **35**, 4851–4853 (2019).
- 30 19. Burgess, S. *et al.* Guidelines for performing Mendelian randomization  
31 investigations: update for summer 2023. *Wellcome Open Res.* **4**, 186 (2023).
- 32 20. Carlsson, S., Ahlbom, A., Lichtenstein, P. & Andersson, T. Shared genetic  
33 influence of BMI, physical activity and type 2 diabetes: a twin study. *Diabetologia* **56**,  
34 1031–1035 (2013).
- 35 21. Mendelian randomization analysis with multiple genetic variants using  
36 summarized data - PubMed. <https://pubmed.ncbi.nlm.nih.gov/24114802/>.
- 37 22. Hemani, G. *et al.* The MR-Base platform supports systematic causal inference  
38 across the human phenome. *eLife* **7**, e34408.
- 39 23. Yavorska, O. O. & Burgess, S. MendelianRandomization: an R package for  
40 performing Mendelian randomization analyses using summarized data. *Int. J.*

- 1 *Epidemiol.* **46**, 1734–1739 (2017).
- 2 24. Verbanck, M., Chen, C.-Y., Neale, B. & Do, R. Detection of widespread  
3 horizontal pleiotropy in causal relationships inferred from Mendelian randomization  
4 between complex traits and diseases. *Nat. Genet.* **50**, 693–698 (2018).
- 5 25. Bowden, J., Davey Smith, G., Haycock, P. C. & Burgess, S. Consistent  
6 Estimation in Mendelian Randomization with Some Invalid Instruments Using a  
7 Weighted Median Estimator. *Genet. Epidemiol.* **40**, 304–314 (2016).
- 8 26. Burgess, S., Butterworth, A. & Thompson, S. G. Mendelian Randomization  
9 Analysis With Multiple Genetic Variants Using Summarized Data. *Genet. Epidemiol.*  
10 **37**, 658–665 (2013).
- 11 27. Brown, N. L. *et al.* Bioburden after *Staphylococcus aureus* inoculation in type 1  
12 diabetic rats undergoing internal fixation. *Plast. Reconstr. Surg.* **134**, 412e–419e  
13 (2014).
- 14 28. Moschovi, M. *et al.* Subacute vertebral osteomyelitis in a child with diabetes  
15 mellitus associated with *Fusarium*. *Pediatr. Int. Off. J. Jpn. Pediatr. Soc.* **46**, 740–742  
16 (2004).
- 17 29. Caruso, P. *et al.* When amputation is not the end of the challenge: A successful  
18 therapy for osteomyelitis and soft tissue infection in a patient with type 1 diabetes. *J.*  
19 *Diabetes Investig.* **13**, 209–212 (2022).
- 20 30. Magliano, D. J. *et al.* Excess Risk of Dying From Infectious Causes in Those  
21 With Type 1 and Type 2 Diabetes. *Diabetes Care* **38**, 1274–1280 (2015).
- 22 31. Sanderson, E. *et al.* Mendelian randomization. *Nat. Rev. Methods Primer* **2**, 1–21  
23 (2022).
- 24 32. Berbudi, A., Rahmadika, N., Tjahjadi, A. I. & Ruslami, R. Type 2 Diabetes and  
25 its Impact on the Immune System. *Curr. Diabetes Rev.* **16**, 442–449 (2020).
- 26 33. Daryabor, G., Atashzar, M. R., Kabelitz, D., Meri, S. & Kalantar, K. The Effects  
27 of Type 2 Diabetes Mellitus on Organ Metabolism and the Immune System. *Front.*  
28 *Immunol.* **11**, 1582 (2020).
- 29 34. Burgess, S., Davies, N. M. & Thompson, S. G. Bias due to participant overlap in  
30 two-sample Mendelian randomization. *Genet. Epidemiol.* **40**, 597 (2016).

31

## 32 **Figure Legends**

33 Figure 1. Flowchart of the study design. GWAS, genome-wide association studies;  
34 T1DM, type 1 diabetes mellitus; T2DM, type 2 diabetes mellitus; RA, rheumatoid  
35 arthritis; OM, osteomyelitis; UVMR, Univariable MR; MVMR, multivariable  
36 mendelian randomization; BMI, body mass index; UKBB, United Kingdom Biobank;  
37 IVs, instrument variables.

38 **Figure 2.** Genetically predicted type 1 diabetes and its complications: associations  
39 with osteomyelitis. T1DM, type 1 diabetes mellitus; OM, osteomyelitis; UVMR,  
40 Univariable MR; MVMR, multivariable mendelian randomization; OR, odds ratio; CI,



1 confidence interval; UKBB, United Kingdom Biobank; IVW, Inverse Variance  
2 Weighted; H, Heterogeneity; P, Pleiotropy. p-values (IVW)  $< 0.05$  was considered  
3 suggested different. The Bonferroni-corrected results of the p-values (IVW) in each  
4 group remained consistent with the uncorrected results.

5 **Figure 3.** Genetically predicted type 2 diabetes and its complications: associations  
6 with osteomyelitis. T2DM, type 2 diabetes mellitus; OM, osteomyelitis; UVMR,  
7 Univariable MR; MVMR, multivariable mendelian randomization; OR, odds ratio; CI,  
8 confidence interval; UKBB, United Kingdom Biobank; IVW, Inverse Variance  
9 Weighted; H, Heterogeneity; P, Pleiotropy. The IVW p-value ( $< 0.05$ ) was  
10 considered a statistically suggested difference. IVW p-values below the  
11 Bonferroni-corrected threshold were considered statistically significant.
